# Supplementary material for: Hermeneutic injustice and troubling experiences of interactional inequality: a review
Source: publisher site journal article supplement (doi:10.1515/text-2024-0286), 2026-01-06
Supplement: Supplementary file 1 [file j_text-2024-0286_suppl_001.docx]

**Supplementary material**

**1 Information sources**

Seven electronic databases were searched in October 2022: Social Science Premium Collection (ProQuest); Academic Search Ultimate (EBSCO); Taylor & Francis Online; SAGE Journals Online; Wiley Online Library; Scopus (Elsevier); Psychology Database (ProQuest). The search terms are detailed in Table 1 below. Following contemporary guidance (Greenhalgh & Peacock, 2005; Petticrew & Roberts, 2008) we also searched for records from the reference collections of our own and of our colleagues. Based on these searchers a collection of 586 articles was assembled.

Table 1. Search terms for database search

| Word group 1 | Word group 2 | Word group 3 | Word group 4 |
| --- | --- | --- | --- |
| conversation analysis | social interaction | “reported speech” OR “past events” OR “constructed dialogue” OR metatalk OR metainteraction OR metapragmatics OR metaconversation OR metainteraction OR metacommunication | complaint OR “troubles telling” OR bullying OR harassment OR sexism OR discrimination OR racism OR ageism OR “social exclusion” OR prejudice OR misunderstanding OR miscommunication OR “negative experience” |

The first author undertook searching and initial screening of titles and abstracts, excluding duplicates and those publications that clearly did not meet the following criteria:

1. Published in peer-reviewed journals (no date restrictions).

2. In English.

3. Empirical article

4. Involves analysis of audio/audio-visual recording of human social interaction

As a result, a collection of 484 publications was compiled.

References:

Greenhalgh, Trisha & Richard Peacock. 2005. Effectiveness and efficiency of search methods in systematic reviews of complex evidence: Audit of primary sources. *British Medical Journal* 331(7524). 1064–1065.

Petticrew, Mark & Helen Roberts. 2008. *Systematic reviews in the social sciences: A practical guide*. Wiley.

**2 Study selection**

The remaining 484 records were each independently assessed by two authors. During this phase, the abstracts were examined more carefully with adherence to the following inclusion criteria:

1. The data analyzed in the article includes narratives of past TEIIs.

2. These TEIIs have been experienced as problematic by the tellers.

3. These TEIIs are framed as problematic also by the researchers.

4. The TEIIs have taken place in face-to-face encounters.

5. The interactional trouble is not (only) caused by the narrator themselves but (also) others are to blame.

6. The narratives of the TEIIs (that the analysis focuses on) have also been produced in face-to-face interactional encounters (i.e., naturally occurring interactions or research interviews).

7. The empirical data analysis in the article deals with the dynamics of narration.

All authors participated in the reviewing, with six different pairs of authors being responsible for the assessment of one part of the records (HN & AV; ML & AV; ML & HN; AV & MS; MS & EW; HN & MS). Disagreements were resolved through joint discussion by all authors. As a result, we excluded 375 records. The remaining 109 records were subjected to full-text screening conducted by two authors (EW & MS), after which a set of 30 records was compiled. In response to comments from the anonymous reviewers, the final collection was complemented by two additional records, resulting in a total of 32.

Not all studies that met the inclusion criteria explicitly framed their focus in terms of inequality or discrimination, but we considered them nonetheless to offer valuable insight into how people account for their troubling interactional experiences. Rather than taking hermeneutical injustice as our starting point, we aimed to synthesize general research on storytelling and complaints about troubling experiences with scholarship on inequality and injustice, to examine how difficulties in articulating TEII accounts may reflect broader societal dynamics.

Among the articles, the oldest dates back to 1998, a focus however being on publications from the 2010s and 2020s. The journals represented in the final collection are: *Journal of Pragmatics* (n=4), *Research on Language and Social Interaction* (n=3), *British Journal of Social Psychology* (n=2), *Journal of Language and Social Psychology* (n=2), *Narrative Inquiry* (n=2), *Work, Gender, and Organization* (n=2), *Culture and Organization* (n=1), *Language in Society* (n=1), *Discourse and Society* (n=1), *Discourse Processes* (n=1), *Discourse Studies* (n=1), *Text and Talk* (n=1), *Journal of Sociolinguistics* (n=1), *Journal of Greek Linguistics* (n=1), *Journal of Applied Linguistics and Professional Practice* (n=1), *Journal of Family Therapy* (n=1), *Journal of English as Lingua Franca* (n=1), *Childhood* (n=1), *Criminal Law Forum* (n=1), *Healthcare* (n=1), *Qualitative Research in Medicine & Healthcare* (n=1), *Communication & Medicine* (n=1), and *Qualitative Health Research* (n=1).

Although “conversation analysis” was the only methodological approach explicitly mentioned in the database search criteria, the final article set represented a wider range of discursive research methods, many of which were combined in single articles: conversation analysis (n=21), (critical) discursive psychology (n=6), narrative (positioning) analysis (n=6), membership categorization analysis (n=4), positioning analysis (n=3), ethnomethodology (n=2), discourse analysis (n=2), ethnography (n=3), dialogical analysis (n=1), and interactional linguistics (n=1).

The empirical analyses in the articles were based on interactional data drawn from mundane contexts (n=6), institutional settings (n=15), informal workplace interactions (n=1), or researcher-initiated interviews or group discussions (n=10).

**3 Synthesizing the evidence**

The process to synthesize the evidence contained in the 32 articles in our data set (see Table 2 below) consisted of two key phases. First, we read each article, aiming to grasp their key features in their own terms, extracting the pertinent information in each given article on an Excel sheet. In doing so, we could familiarize ourselves with the recurring themes, patterns, and interactional practices related to *troubling experiences of interactional inequality* (TEIIs) and people’s ways of accounting for them. At the same time, we engaged in an iterative process of developing and refining the coding scheme in response to the new phenomena encountered in the articles. In other words, the coding scheme evolved dynamically as we progressed through the review, with constant revisions and adjustments made to ensure its accuracy, comprehensiveness, and relevance to the wider goals of our review.

During the second phase of our analytic process, we synthesized the findings with reference to four broad dimensions of TEIIs. First, we described the primary contexts of the troubling experiences (*Nature of trouble*). Second, we summarized the findings regarding the personal motives and goals that a teller might have when seeking to account for these experiences (*Stakes of the teller*). Third, we brought together findings regarding the narrative and discursive resources that are available to tellers for making their experiences culturally intelligible (*Narrative and discursive resources*). Fourth and finally, we reviewed evidence about the outcomes of accounts for TEIIs and the implications that these outcomes have for different tellers in different contexts (*Consequences of telling*). In and through the discussion of these four dimensions of TEIIs, we sought to shed light on the possible inequalities that there might be in the resources of various groups of people to account for their TEIIs.

**Table 2**. Key characteristics of the 30 included publications and their contribution to the findings

| Details of the study | | Contribution to the results | | | |
| --- | --- | --- | --- | --- | --- |
| Publication, methods | Data characteristics | Conditions of TEIIs | Stakes of the teller | Narrative and discursive resources | Local consequences of telling |
| 1. Kerby & Rae (1998). *British Journal of Social Psychology*  - conversation analysis, membership categorization analysis | - researcher-initiated group discussions  - six sessions  - 13 participants attending to a day centre for young people for reasons such as refusing to go to school, being disruptive at school or being directed by the youth court  - audiovisual | - TEIIs caused by deviance from social norms | -visibility of moral identity  -identity-constitutive work through categorization as a resource | - casting the event as a deviation from “normality”  - protecting the moral self  - reporting the use of address terms as a way of indexing shared understanding | - not described |
| 2. Trinch & Berk-Seligson (2007). *Language in Society*  - conversation analysis, sociolinguistics, ethnography of speaking | - institutional  - 40 protective order application interviews, collected in the Domestic Violence Section of a district attorney's office in the US  - audio only | - TEIIs involving concrete violence and partner abuse | - obtaining a protective order | - reported speech as a way of creating suspense in the story  - difficulties in constructing the account in the required form | - dismissal of “wrong kind” of stories  - personal stories becoming co-constructed with paralegal into format required by institutions  - lost details |
| 3. Stokoe & Edwards (2007). *Discourse and Society*  - conversation analysis | - institutional  - 125 hours of neighbour dispute interaction (incl. neighbour mediation sessions, police interrogations, and telephone calls to mediation centres, environmental health departments and antisocial behaviour helplines)  - audio only | - TEIIs arising from broader structural injustices, involving racist insults and covert prejudices  - intersectional TEIIs, influenced by both gender and ethnicity | - reporting racial insults as counter-complaints against other parties | - reported speech as a display of objectivity  - generalizing devices  - use of laughter to handle the “subject side” of complaints | - lack of affiliation for “wrong kind of stories”  - recipients upholding neutrality in institutional settings  - co-constructing story into “correct form” for police report |
| 4. Ruusuvuori & Lindfors (2009). *Journal of Pragmatics*  - conversation analysis | - institutional  - 40 homoeopathic and 40 general practice consultations in Finland  - audiovisual | - TEIIs by healthcare clients, caused by the professionals’ treatment mistakes or their lack of seriousness in treating their patients | -third-party complaints as accounting for the reason to seek healthcare professional’s help  - constructing critical stance to build trust in the client-professional relationship | - reported speech and extreme case formulations as ways of constructing blame | - recipients upholding neutrality in institutional settings  - recipients refraining from affiliating to allocations of blame |
| 5. Christodoulidou (2010). *Journal of Greek Linguistics*  - conversation analysis | - mundane  - 3 hours of informal conversations between friends, relatives, co-workers during dinner, coffee etc.  - audio only | - TEIIs across various domains of people’s everyday lives | -highlighting teller’s innocence and the third party’s wrongdoings | - evidencing access by detailing  - reported speech to highlight one’s own innocence  - displays of negative affect, exclamations, pre-announcements, and address terms to catch the recipients’ attention  - use of repetition and excessive detail to convey deliberate action | - story recipients explicitly expressing affiliation in various manners |
| 6. Vöge (2010). *Journal of Pragmatics*  - conversation analysis | - institutional  - 15 h of interaction in 14 business meetings in a major international company, located in Germany  - 40–60 minutes per meeting  - audiovisual | - TEIIs at work, involving both interactions between colleagues at the same hierarchical level and interactions from subordinates to superiors | -negotiating hierarchy socially  -shaping hierarchy and seniority through laughter  -seeking affiliation with co-present colleagues through complaining | - occupying epistemic authority to the events described  - reported speech as a narrative device, a display of objectivity, and a way of justifying blame  - using exaggerated tone and gestures to present the reported event as a laughable  - use of laughter to express moral indignation implicitly  - distancing | - Recipients expressing affiliation implicitly through e.g., laughter because of complaints’ delicate context |
| 7. Jingree & Finlay (2013). *British Journal of Social Psychology*  - discourse analysis, critical discursive psychology | - researcher-initiated single-person interviews  - 11 participants with learning disabilities, recruited through residential care homes and day-centres in the UK  - 30–90 minuters per interview  - audio only | - TEIIs for individuals with learning disabilities, caused by public authoritative descriptions and categorizations | -services as disempowering to those with learning disabilities  - complaining as counterbalancing disempowering practices  - constructing identities flexibly to argue against disempowerment | - reported speech as a way of justifying blame  - evidencing access by detailing  - difficulties in constructing the account in the required form  - undermining the severity of the problem | - not described |
| 8. Van De Mieroop & Clifton (2013). *Discourse Processes*  - narrative positioning analysis | - 23 interviews with former slaves, recorded in the 1930s  - 7 hours  - audio only | - TEIIs caused by hegemonic power asymmetries | -claiming power in storyworld  -resisting or conforming to hegemonic power relations  -performing power through reported speech | - occupying epistemic authority to the events described  - reported speech to counter problems of tellability | - not described |
| 9. Ingrids & Aronsson (2014). *Research on Language and Social Interaction*  - conversation analysis | - institutional  - 42 sets of courtroom examinations of both sides in child custody disputes in 29 Swedish courts  - audio only | - parents’ TEIIs that also involve their children | -claiming identity of best parent with the aim of claiming custody  -epistemic claims through direct reported speech  - establishing and protecting litigant’s authority | - occupying epistemic authority to the events described  - reported speech to increase authenticity and to create alternative versions with upgraded epistemic claims | -not described |
| 10. O’Reilly & Parker (2014). *Journal of Family Therapy*  - discourse analysis | - institutional  - 22 h of family therapy sessions in the UK  - two therapists and four families  - audiovisual | - TEIIs that involve children’s exposure to specific topics | - presenting good parenthood through avoiding responsibility | - constructing blame and responsibility  - highlighting one’s own innocence | - therapists delicately challenging parents’ problematic behavior through e.g., questions to not challenge parental authority  - therapists maintaining neutrality in regard to clients’ complaints of officials, reformulating “more appropriate” position |
| 11. Varjonen et al. (2016). *Journal of Language and Social Psychology*  - discursive psychology | - researcher-initiated group discussions  - nine focus groups with 34 ethnic Finnish migrants who have moved to Finland in adulthood from Russia, Canada, or the US  - around 14 h  - audio only | - TEIIs associated with broader societal problems, such as racism  - TEIIs experienced by individuals with immigrant, who can be offended by complete strangers in public places | - problematizing or downplaying discrimination  - challenging and increasing the permeability of the borders of the majority group | - casting the event as a deviation from “normality”  - reported speech as a narrative device  - evidencing access by detailing  - highlighting one’s own innocence  - undermining the severity of the problem | - recipients validating account of discrimination  - recipients disaffiliating from accounts to save positive image of self, placing blame of discrimination on victim and normalizing discrimination |
| 12. Konakahara (2017). *Journal of English as Lingua Franca*  - discursive psychology  - politeness theory | - mundane  - social gatherings or lunch breaks among 2–4 friends  - 30 international students studying at British universities  - audiovisual and audio only | - TEIIs experienced by students with immigrant background, who can encounter face behavior from tutors and lecturers | - complaining about a third party  - mutual face saving | - evidencing access by detailing  - reported speech as a display of objectivity  - extreme case formulations as a way of legitimizing the complaint  - using exclamations, repetitions, and prosodic and embodied expression to claim seriousness of the complaint  - distancing | - recipients expressing approval but subtly disaffiliating from complaints to protect faces of self, complainer, and complaint target |
| 13. Svahn (2017). *Childhood*  - conversation analysis | - one-year ethnographic field study, combining participant observations with video recordings  - 11-year-old children in a fifth grade class in a Swedish elementary school | - TEIIs experienced by preadolescent girls due to their schoolmates actions at school | - legitimizing own negative assessments, sanctioning peers | - reported speech as a way of justifying blame  - heightened affective displays to maintain or escalate the controversies | - recipients affiliating through co-constructed complaint sequences  - present complaint target’s difficulties to express disagreement |
| 14. Svahn & Karlsson (2017). *Narrative Inquiry*  - ethnography, conversation analysis, narrative analysis | - one-year ethnographic field study, combining participant observations with video recordings  - 11-year-old children in a fifth grade class in a Swedish elementary school | - TEIIs experienced by school children due to the actions of another child's mother | -reallocation of blame, avoiding responsibility and sanctions  - resisting institutional agenda | - highlighting one’s own innocence  - evidencing access by detailing  - reported speech to increase credibility and as self-protective moral work  - extreme case formulations to achieve credibility  - difficulties in constructing the account in the required form | - affiliative peer recipients siding with storyteller, co-constructing story as believable  - disaffiliative adult challenging storyline, guiding it towards more normative one; presenting described problem as not serious |
| 15. Jones & Clifton (2018). *Gender, Work, and Organization*  - narrative positioning analysis | - researcher-initiated single-person interviews (1–3 h)  - eight women entrepreneurs in Wales, who had participated in a leadership development programme  - audio only | - TEIIs experienced by female entrepreneurs caused by gendered assumptions | -avoiding disempowerment through denying sexism and discrimination | - reported speech as a way of justifying blame  - undermining the severity of the problem | - not described |
| 16. Caronia (2019). *Journal of Applied Linguistics and Professional Practice*  - conversation analysis | - institutional  - 46 parent-teacher conferences in two primary schools in northern Italy  - audiovisual | - TEIIs in both school and home, related to the passivity of a schoolchild in schoolwork and other school-relative behavior | -establishing a problem trajectory over teacher’s no-problem trajectory  -blaming the teacher | - occupying epistemic authority to the events described  - reported speech as a way of justifying blame | - interactional tension from teacher and mother’s attempts to construct different storylines about child’s behavior and classroom practices |
| 17. Prior (2019). *Journal of Pragmatics*  - conversation analysis, membership categorization analysis, discursive psychology | - researcher-initiated single-person interview  - a bilingual woman who has immigrated to the US from Vietnam 5 years ago  - 90 minutes  - audio only | - TEIIs of individuals with immigrant background | - challenging transgressive people and actions  - eliciting affiliation  - contrasting and scaling  - | - highlighting one’s own innocence  - reported speech as a display of objectivity and of one’s own assertiveness  - reporting the antagonist’s use of extreme case formulations to underline the offense  - generalizing devices  - laughter to distance from the trouble  - distancing | - storyteller seeking affiliation by upgrading or downgrading previous problem description  - interviewer’s question regarding truth of previous statement resulting in downgrading previous reported speech |
| 18. Thompson et al. (2019). *Qualitative Health Research*  - conversation analysis, dialogical analysis | - researcher-initiated group discussions  - three focus groups for 20 participants with MS diagnosis  - 193 minutes  - audio only | - TEIIs of persons with invisible chronic illnesses, who systematically need to fight against ableism | -criticizing, through parody, co-workers for miscategorizing the condition of people with chronic illness | - reported speech as a way of justifying blame  - reporting the antagonists’ use of exclamations to highlight the inconsiderateness of their speech  - distancing | - not described |
| 19. Evaldsson &  Melander Bowden (2020). *Text and Talk*  - ethnomethodology | - institutional  - 40 h of interaction in a special needs classroom  - 1 girl and 6 boys (9–11 years old), all diagnosed with ADHD  - audiovisual | - TEIIs experienced by children | -highlighting bad treatment | - affectively cued reported speech, extreme case formulations and other heightened affective displays to justify the feeling of being hurt, which however backfires, leading to a loss of credibility | - not described |
| 20. Jacobs et al. (2020). *Narrative Inquiry*  - membership categorization analysis | - workplace interaction  - 14 hours of data self-recorded by six Belgian women with migration roots  - audio only | - TEIIs caused by the majority population’s negative assumption about immigrant workers | - highlighting ethnic discrimination and one’s identity as a professional | - reported speech as a way of concretizing the events described and justifying blame  - extreme case formulations to achieve credibility | - storyteller and recipient collaboratively constructing a point about microagression towards their common group |
| 21. Heinrichsmeier (2021a). *Journal of Sociolinguistics*  - conversation analysis, membership categorization analysis | - mundane  - 20h of conversations between nine female clients and salon workers  - audio only | - TEIIs caused by family members | - constructing culpability | - constructing blame and responsibility  - casting the event as a deviation from “normality”  - reported speech to justify blame and to protect the moral self  - reporting the antagonist’s use of extreme case formulations to underline the offense | - recipient steering focus away from complaint, redirecting culpability  - recipient affiliating to allocations of blame only implicitly |
| 22. Heinrichsmeier (2021b). *Journal of Pragmatics*  - conversation analysis, narrative positioning analysis | - mundane  - 20h of conversations between nine female clients and salon workers  - audio only | - TEIIs caused by close family members and officials | -highlighting something as an offence and stressing rudeness of it | - reported speech to justify blame and to regain agency  - reporting the antagonist’s use of extreme case formulations to underline the offense | - story recipients affiliating to storyteller’s accounts of own empowered action  - recipients disaffiliating from complaints when self portrayed as passive and only speech of antagonist is reported, instead more likely offering advice |
| 23. Wilkes & Speer (2021). *Journal of Language and Social Psychology*  - conversation analysis | - institutional  - ten support group meetings for kinship carers  - 6-20 participants in each meeting (92 participants in total)  - audiovisual | - TEIIs caused by normative conceptions about parenthood | - constructing protective parenthood  - highlighting microaggressions | - occupying epistemic authority to the events described  - constructing blame and responsibility  - highlighting one’s own innocence  - reported speech as a way of justifying blame  - difficulties in constructing the account in the required form | - receiving affiliation, possibilities for problem resolution in support group |
| 24. Cantarutti (2022). *Research on Language and Social Interaction*  - conversation analysis, interactional linguistics | - mundane  - 10 h of interaction between friends, relatives, or coworkers  - audiovisual | - TEIIs associated with various types of mundane trouble | - presenting oneself as a victim  - establishing recipient as a witness | - occupying epistemic authority to the events described  - evidencing access by detailing  - reported speech as a way of justifying blame  - heightened affective displays to cast oneself as a victim | - recipients as co-experiencers affiliating strongly and co-constructing story’s complainability by co-animation |
| 25. D'hondt et al. (2022). *Criminal Law Forum*  - ethnomethodology, conversation analysis | - institutional  - international criminal court  - three victims testifying on harm inflicted on them  - audio only | - TEIIs caused by criminals | - establishing harm  - establishing criminal liability | - heightened affective displays to increase the credibility of the testimony | - recipients guiding storyteller’s account to institutionally acceptable form |
| 26. Weiste et al. (2022). *Healthcare*  - narrative positioning analysis | - 14 researcher-initiated single-person interviews for healthcare service users  - 14 participants  - 26 stories about negative service experiences  - audio only | - TEIIs arising from the ideals of client involvement in the instances of severe chronic illnesses  - a dilemma in demonstrating both eligibility for healthcare services due to illness and competence in actively managing that illness | - highlighting lack of right kind of care through resisting the ideal of active client | - constructing blame and responsibility  - highlighting one’s own innocence  - heightened affective displays to invite affiliative response | - interviewer as active story recipient, helping co-construct story as problematic, offering affiliation |
| 27. Pino (2022). *Research on Language and Social Interaction*  - conversation analysis | - institutional  - four facilitated group meetings for bereaved people  - 2–3 volunteers and 5–8 clients in each meeting  - audio only | - TEIIs related to the interactional handling of the loss of a loved one | -displaying hurt  -blaming significant other | - constructing blame and responsibility  - adding detail about the complainable conduct to create opportunities for recipient affiliation | -receiving affiliation for impact of events, but not for blame allocation |
| 28. Olakivi et al. (2024). *Culture and Organization*  - conversation analysis, positioning analysis | - institutional  125 performance appraisal interviews  - 84 supervisors and 122 subordinates  - audiovisual | - TEIIs arising from age-related non-recognition and discrimination | -indicating ageist discrimination | - difficulties in constructing the account in the required form  - undermining the severity of the problem  - extreme case formulations as a way of legitimizing the complaint | - receiving affiliation for impact of events, not for blame allocation  - recipient implying non-solvability of problem  -recipient demanding granularity |
| 29. Stevanovic et al. (2024). *Work, Gender, and Organization*  - conversation analysis, positioning analysis | - institutional  - 125 performance appraisal interviews  - 84 supervisors and 122 subordinates  - audiovisual | - TEIIs caused by gender stereotypes at workplaces  - specific challenges for female leaders | - getting help from supervisor  - presenting oneself as a rational problem-solver | - evidencing access by detailing  - highlighting one’s own innocence  - reported speech and heightened affective displays to boost tellability and to call for the recipient’s attention  - laughter as a display of one’s own assertiveness as a delicate matter  - orientation to the inappropriateness of one’s own telling  - undermining the problems’s severity  - difficulties in constructing the account as required | -recipient demanding granularity  -recipient minimising problematic nature of story |
| 30. Weiste et al. (2024). *Qualitative Research in Medicine & Healthcare*  - narrative positioning analysis | - 20 researcher-initiated single-person interviews for healthcare professionals  - 20 participants  - 18 troubling client encounters  - audio only | - TEIIs caused by both healthcare clients’ passivity and excessive activity | -criticizing clients  -difficulties in performing good health care due to passivity or over-activity of the clients | - constructing blame and responsibility  - extreme case formulations as a way of legitimizing the complaint  - difficulties in constructing the account in the required form | - recipient affiliating with culturally normative complaints, disaffiliating with non-normative |
| 31. Hitzler (2024) *Discourse Studies*  - conversation analysis  - ethnography | - single extended sequence analyzed  - 5 peer support groups, 2-4 meetings/group, about 2 h/meeting  -audio recordings and ethnographic observations  - audio only | - TEII linked to teller’s difficulties in meeting the expectations of ordinariness due to obesity and post-surgery lifestyle | - navigating social identity and inclusion  - seeking validation and shared understanding in a group context | - laughter  - mitigating potential troublesomeness by framing the TEII as humour  - ambiguity of narrative interpretive footing as a way of managing moral insecurity  - reported speech as a way of highlighting normative tension | - recipients producing second stories to recontextualize the experience as problematic and display solidarity  - co-construction of alternative ordinariness and normality among peers |
| 32. Pino & Mortari (2013). *Communication & Medicine*  - conversation analysis | - institutional  - 4 hours of therapeutic community (TC) meetings involving clients and professionals  -12 clients diagnosed with mental disorders  - audio only | - TEIIs experienced by TC clients, caused by being mistreated by other people (such as family members, non-present other clients or non-present professionals) in their everyday life | - seeking affiliation for their experiences from professionals  - blaming others by describing their behavior as transgressing moral norms about appropriate conduct | - constructing blame and responsibility  - reported speech as a way of hinting at blame  - use of idiomatic expressions  - affective displays  - vagueness and generalization | - lack of affiliation with the complaint aspect; maintenance of professional neutrality  - recipients reframing the events as less problematic; lessening moral significance  - recipients challenging the grounds of the complaint |
